# Supplementary material for: Integrative single-cell RNA sequencing and metabolomics decipher the imbalanced lipid-metabolism in maladaptive immune responses during sepsis
Source: PubMed Central journal article supplement (PMC10172510; doi:10.3389/fimmu.2023.1181697), 2023-04-27

## Supplementary Figure2

A

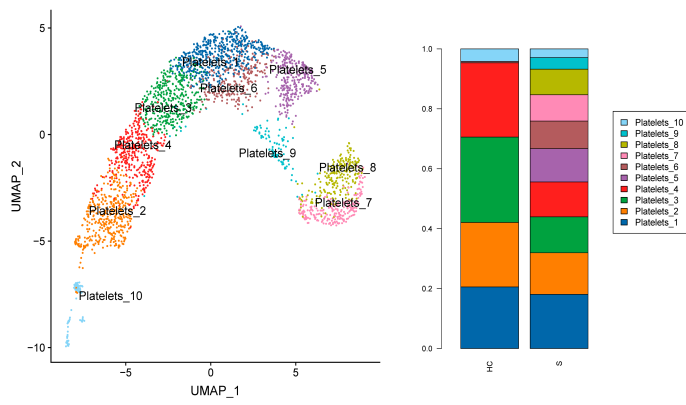

B

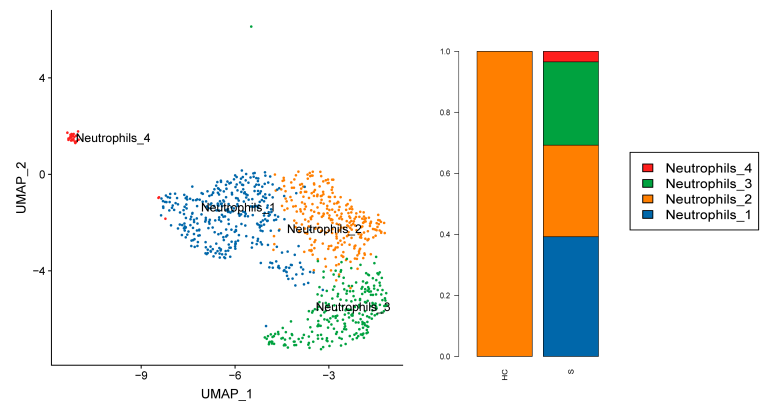

Supplement: DataSheet_2.pdf [file DataSheet_2.pdf]
